# Supplementary material for: Modulating the Mechanical Properties of Electrospun PHB/PCL Materials by Using Different Types of Collectors and Heat Sealing
Source: PubMed Central journal article supplement (PMC7183258; doi:10.3390/polym12030693), 2020-03-20
Supplement: polymers-12-00693-s001.pdf [file polymers-12-00693-s001.pdf]

Supplementary data

# Modulating the Mechanical Properties of Electrospun PHB/PCL Materials by Using Different Types of Collectors and Heat Sealing

Irena Borisova, Olya Stoilova\*, Nevena Manolova and Iliya Rashkov

Laboratory of Bioactive Polymers, Institute of Polymers, Bulgarian Academy of Sciences, Acad. G. Bonchev St, bl. 103A, 1113 Sofia, Bulgaria; stoilova@polymer.bas.bg

\* Correspondence: [stoilova@polymer.bas.bg](mailto:stoilova@polymer.bas.bg) (O.S.)

The stress–strain curves shown in Figure S1 represent the behavior of PHB/PCL materials subjected to a constant load.

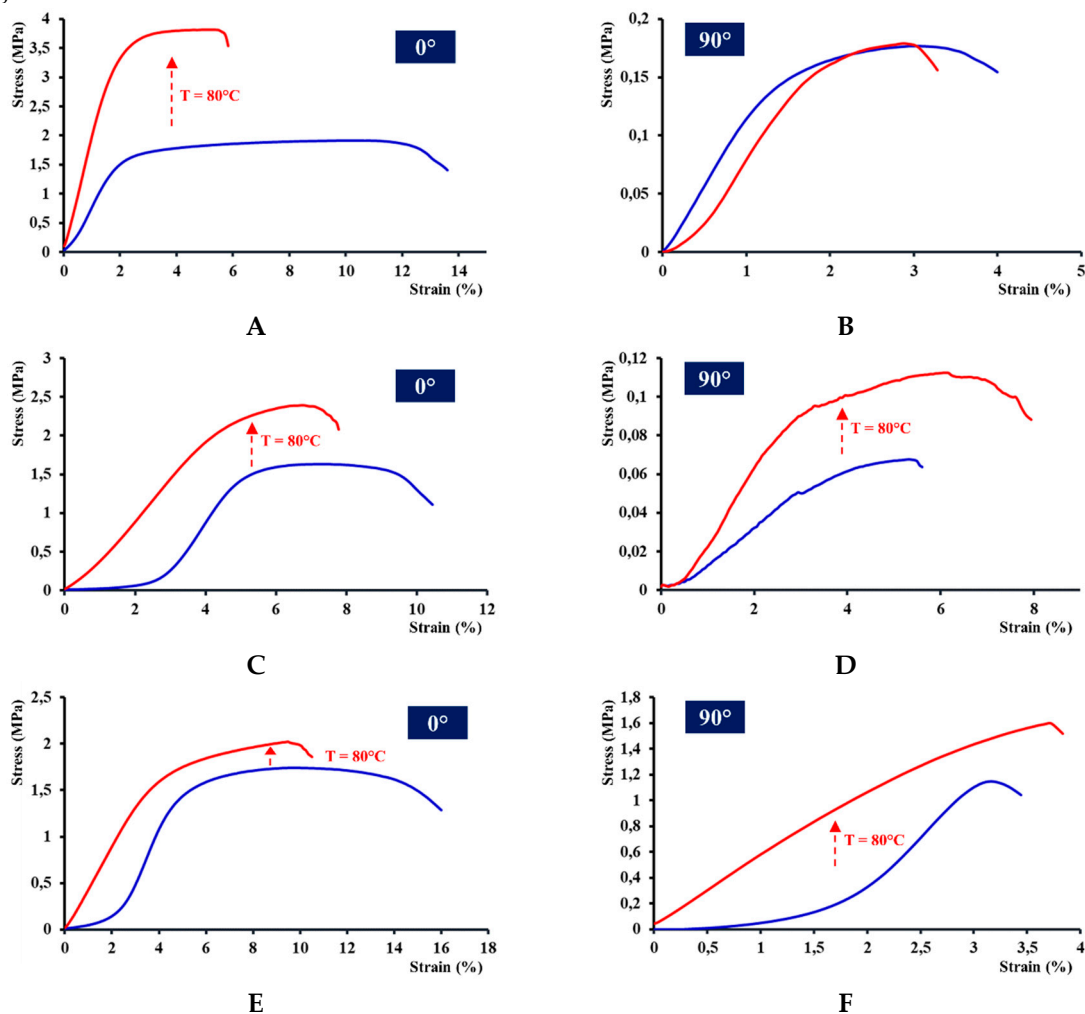

**Figure S1.** Stress–strain curves of the PHB/PCL mats before (blue) and after (red) thermal treatment onto rotating drum (A, B), blade (C, D) and grid (E, F) collectors at different directions of cutting.
